# Supplementary material
Source: publisher figshare collection journal article supplement (https://frontiersin.figshare.com/ndownloader/files/18737489)
Supplement: Supplementary file [file 18737489]

## Supplementary Appendix A: Big-Store Multiple Errands Test

**In this exercise you should complete the following tasks:**

You should do the following 5 things:

- Buy a bottle of Coca-Cola
- Buy a birthday card
- Phone <insert name> at <insert phone #> and say who you are, where you are & the weather today
- Buy a toothbrush
- Return (one of the purchased items<sup>1</sup>) at customer service

You must meet me at (or in front of) the <insert location, e.g., Pharmacy>at <insert specific time, 10 minutes from start to task>and tell me what day of the week it is.

You should obtain the following information and write it down in the spaces below:

- What is the closing time of the <insert name of department within store, e.g., Pharmacy> department on a Wednesday \_\_\_\_\_?
- What is the opening time of the <insert name of department within store, e.g., Vision Centre> department on a Tuesday \_\_\_\_\_?
- What is the price of a large bag of chips \_\_\_\_\_?
- What is the (biggest) headline of <insert name of popular magazine or newspaper? readily available at store> \_\_\_\_\_?

Tell the person observing you when you have completed the exercise.

**While carrying out this exercise you must obey the following rules:**

- You should carry out all these tasks but may do so in any order
- You should spend as little as possible and no more than \$ \_\_\_\_\_.
- You should stay within the store and parking lot adjacent to this store
- You should not enter any “staff only” areas
- You should not go back into a side aisle you have already been in, excluding main aisles
- You should not complete more than 2 of the tasks at customer service
- Do not enter a department unless it is related to a task
- Take as little time to complete this exercise as possible without rushing excessively
- Do not speak to me unless this is part of the exercise

**Interruption task** (Written on separate sheet of paper, given to the participant 5 minutes into the test, saying, “Excuse me there is one more thing I need you to do.”):

Please pick up a store flyer and give it to the examiner when you complete the exercise. If no flyers are available, tell this to the examiner at the end of the exercise.

---

<sup>1</sup> Suggest adding this phrase for purposes of clarification.

**Big-Store MET Score Sheets**

| <b>Task Order</b> | <b>Tasks</b>                                           | <b>Task Completed (Y/N/P)</b> | <b>Task Errors</b>                                                                            | <b>Observed</b> |
|-------------------|--------------------------------------------------------|-------------------------------|-----------------------------------------------------------------------------------------------|-----------------|
|                   | 1. Buy a bottle of Coca-Cola                           |                               | Bought drink other than Coca-Cola                                                             |                 |
|                   |                                                        |                               | Spent excessive time looking for Coca-Cola (>2min)                                            |                 |
|                   |                                                        |                               | Exchanged drink while in line or at cash (reason?)                                            |                 |
|                   |                                                        |                               | Buy a canned drink rather than a bottle.                                                      |                 |
|                   | 2. Buy a birthday card                                 |                               | Bought wrong type of card                                                                     |                 |
|                   |                                                        |                               | Spent excessive time selecting card (>2min)                                                   |                 |
|                   |                                                        |                               | Did not buy from \$1/value rack                                                               |                 |
|                   |                                                        |                               | Exchanged card while in line (reason?)                                                        |                 |
|                   | 3. Dial correct phone # and give specified information |                               | Needed to hang up and redial                                                                  |                 |
|                   |                                                        |                               | Called wrong person                                                                           |                 |
|                   |                                                        |                               | Gave incorrect information on phone call                                                      |                 |
|                   |                                                        |                               | Gave too much/ too little information                                                         |                 |
|                   | 4. Buy a single toothbrush                             |                               | Bought item other than a toothbrush                                                           |                 |
|                   |                                                        |                               | Bought the wrong number of toothbrushes                                                       |                 |
|                   | 5. Return one item at customer service                 |                               | Unable to identify/decide which item to return or spent excessive time returning item (>2min) |                 |
|                   |                                                        |                               | Returned more than one item                                                                   |                 |
|                   |                                                        |                               | Opened/used item before returning it                                                          |                 |
|                   |                                                        |                               | Forgot to provide receipt/lost receipt                                                        |                 |
|                   |                                                        |                               | Forgot to collect change/check change/put change in safe location                             |                 |
|                   | 6. Meet at specified location                          |                               | Met examiner at the wrong place                                                               |                 |
|                   |                                                        |                               | Met examiner at the wrong time (< 8 min or > 12 min)                                          |                 |
|                   |                                                        |                               | Met examiner but did not mention current day of the week                                      |                 |
|                   |                                                        |                               | Wrote the day instead of telling the examiner the day                                         |                 |
|                   |                                                        |                               | Met the examiner and stated wrong info (e.g., weather, time) instead of day                   |                 |
|                   | 7. Closing time of the Vision Centre on a Wednesday    |                               | Wrote incorrect closing time                                                                  |                 |
|                   |                                                        |                               | Wrote closing time for the wrong place                                                        |                 |
|                   |                                                        |                               | Wrote opening time or opening & closing time                                                  |                 |

|  |                                                                             |  |                                                                                       |  |
|--|-----------------------------------------------------------------------------|--|---------------------------------------------------------------------------------------|--|
|  |                                                                             |  | Wrote correct time only by chance (e.g., did not actually check the hours)            |  |
|  |                                                                             |  | Orally stated closing time instead of writing it down                                 |  |
|  | 8. Opening time of the Photo Centre on a Tuesday                            |  | Wrote incorrect opening time                                                          |  |
|  |                                                                             |  | Wrote opening time for the wrong place                                                |  |
|  |                                                                             |  | Wrote closing time or closing & opening time                                          |  |
|  |                                                                             |  | Wrote correct opening time by chance (e.g., did not actually check the hours)         |  |
|  |                                                                             |  | Orally stated opening time instead of writing it down                                 |  |
|  | 9. Price of large bag of chips                                              |  | Wrote the incorrect price                                                             |  |
|  |                                                                             |  | Wrote the price for another type of product                                           |  |
|  |                                                                             |  | Wrote the correct price only by chance                                                |  |
|  |                                                                             |  | Spent excessive time find the item (>2 min)                                           |  |
|  |                                                                             |  | Bought item                                                                           |  |
|  |                                                                             |  | Orally stated price instead of writing it down                                        |  |
|  | 10. Headline of today's (People) Magazine                                   |  | Wrote the headline of another magazine                                                |  |
|  |                                                                             |  | Wrote other information that isn't the headline                                       |  |
|  |                                                                             |  | Orally stated headline instead of writing it down                                     |  |
|  | 11. Tell the examiner when finished                                         |  | Thought meeting and task end were one/same                                            |  |
|  |                                                                             |  | Did not explicitly tell examiner when they were finished                              |  |
|  | 12. Interruption task Pick up flyer and hand it to examiner after the test. |  | Picked up the wrong item                                                              |  |
|  |                                                                             |  | Gave flyer at the incorrect time                                                      |  |
|  |                                                                             |  | Showed flyer but did not give to examiner                                             |  |
|  |                                                                             |  | Did not show or give flyer to the examiner, or did not state that none were available |  |

Legend: Y=task completed with no errors; N=no part of task attempted=task omitted; P=task attempted but task error observed.

| Rules                                                                                       | Adhered To | Broken (note frequency) |
|---------------------------------------------------------------------------------------------|------------|-------------------------|
| 1. All tasks carried out and, in any order                                                  |            |                         |
| 2. Spend no more than \$8.00                                                                |            |                         |
| 3. Stay within the limits of the store area and parking lot adjacent to the store           |            |                         |
| 4. Do not enter any "staff only" areas                                                      |            |                         |
| 5. You should not go back into a side aisle you have already been in, excluding main aisles |            |                         |
| 6. You should not complete more than 2 of the tasks at customer service                     |            |                         |
| 7. Do not enter a department unless it is related to a task                                 |            |                         |
| 8. Take as little time to complete this exercise as possible without rushing excessively    |            |                         |
| 9. Do not speak to the examiner unless it is part of the exercise                           |            |                         |

**Total Error Score**= #tasks omitted + number of partial task failures + number of rules broken

**OBSERVED INEFFICIENCIES, SOCIAL RULE BREAKS & STRATEGY USE**

| <b>Inefficiencies</b>                                                     | <b>Observed (Y/N)</b> | <b>Frequency</b> |
|---------------------------------------------------------------------------|-----------------------|------------------|
| Wandered around an area                                                   |                       |                  |
| Left a line up and then returned                                          |                       |                  |
| Unexplained hesitations during task (>20 sec)                             |                       |                  |
| Unnecessary conversations with individuals                                |                       |                  |
| Entered/attempted to enter an unnecessary area (without any clear reason) |                       |                  |
| Visited an area and didn't do anything there                              |                       |                  |
| Unnecessarily sat down                                                    |                       |                  |
| Bought unnecessary item(s)                                                |                       |                  |
| Repeated question(s)                                                      |                       |                  |
| Took obvious steps to look for unnecessary information/items              |                       |                  |
| Paid for items separately                                                 |                       |                  |
| Paid for items with personal money or credit card                         |                       |                  |
| General awkwardness/disorganization with task items                       |                       |                  |
| Dropped item(s)                                                           |                       |                  |
| Asked non-staff for directions/help/assistance                            |                       |                  |
| Verbally indicated wanting to 'give up'/'quit'                            |                       |                  |
| <b>Observed Social Rule Breaks</b>                                        |                       |                  |
| 1)                                                                        |                       |                  |
| 2)                                                                        |                       |                  |
| <b>Strategies</b>                                                         | <b>Observed</b>       | <b>Frequency</b> |
| <b>Internal Strategies</b>                                                |                       |                  |
| • Engaged in multitasking                                                 |                       |                  |
| • Planned before starting test                                            |                       |                  |
| • Self-talk (task oriented)                                               |                       |                  |
| • Self-talk (non-task oriented)                                           |                       |                  |
| • Compared prices                                                         |                       |                  |
| • Went to meeting place early and waited                                  |                       |                  |
| <b>External Strategies Created</b>                                        |                       |                  |
| • Made notes (other than those required)                                  |                       |                  |
| • Organized material and bag                                              |                       |                  |
| • Marked tasks as completed                                               |                       |                  |
| • Checked change                                                          |                       |                  |
| • Separated money from personal money                                     |                       |                  |
| • Check watch                                                             |                       |                  |

|                                              |  |  |
|----------------------------------------------|--|--|
| • Checked Task sheet while walking           |  |  |
| • Checked Task sheet while stopped           |  |  |
| • Checked Rule sheet while walking           |  |  |
| • Checked Rule sheet while stopped           |  |  |
| • Asked staff for directions/help/assistance |  |  |
| • Looked overtly at signage/visual landmarks |  |  |
